# Supplementary material for: A new view of heat wave dynamics and predictability over the eastern Mediterranean
Source: Copernicus journal article supplement (doi:10.5194/esd-12-133-2021), 2021-02-04
Supplement: Supplementary file 1 [file esd-12-133-2021-supplement.pdf]

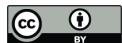

## *Supplement of*

# **A new view of heat wave dynamics and predictability over the eastern Mediterranean**

**Assaf Hochman et al.**

*Correspondence to:* Assaf Hochman ([assaf.hochman@kit.edu](mailto:assaf.hochman@kit.edu))

The copyright of individual parts of the supplement might differ from the CC BY 4.0 License.

**Table S1** The five homogenous representative daily maximum temperature stations over Israel used for computing the absolute error of the model.

| <b>Serial number</b> | <b>Station name</b>                            | <b>Latitude (°)</b> | <b>Longitude (°)</b> | <b>Altitude (m)</b> | <b>WMO number</b> |
|----------------------|------------------------------------------------|---------------------|----------------------|---------------------|-------------------|
| <b>1</b>             | <b>Elat<br/>(desert)</b>                       | 29.55               | 34.95                | 22                  | 401990            |
| <b>2</b>             | <b>Negba<br/>(Coastal plain)</b>               | 31.66               | 34.68                | 95                  |                   |
| <b>3</b>             | <b>Beit-Jimal<br/>(low land)</b>               | 31.72               | 34.98                | 355                 |                   |
| <b>4</b>             | <b>Jerusalem-<br/>center<br/>(mountainous)</b> | 31.78               | 35.22                | 810                 | 402900            |
| <b>5</b>             | <b>Zefat Har-<br/>Kenaan<br/>(mountainous)</b> | 32.98               | 35.51                | 936                 | 401530            |

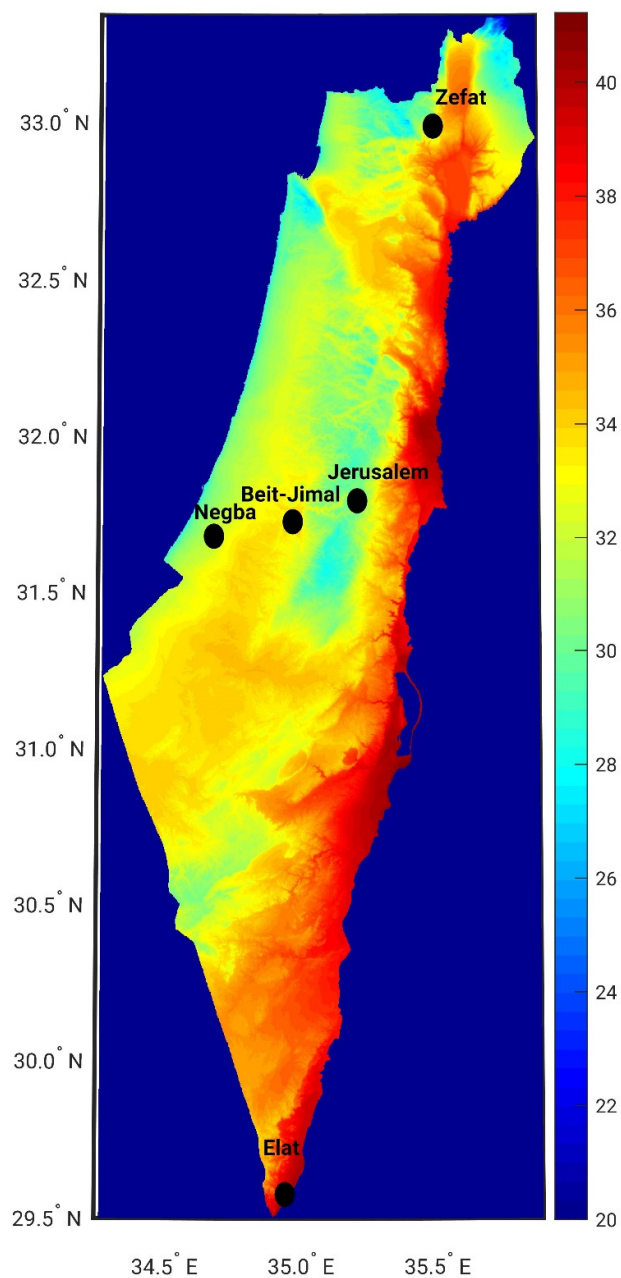

**Figure S1** The five homogenized stations on top of the average summer (July-August) temperature over Israel computed for 1995 - 2009 (<https://ims.gov.il/he/node/1611> ; shaded in color – °C).

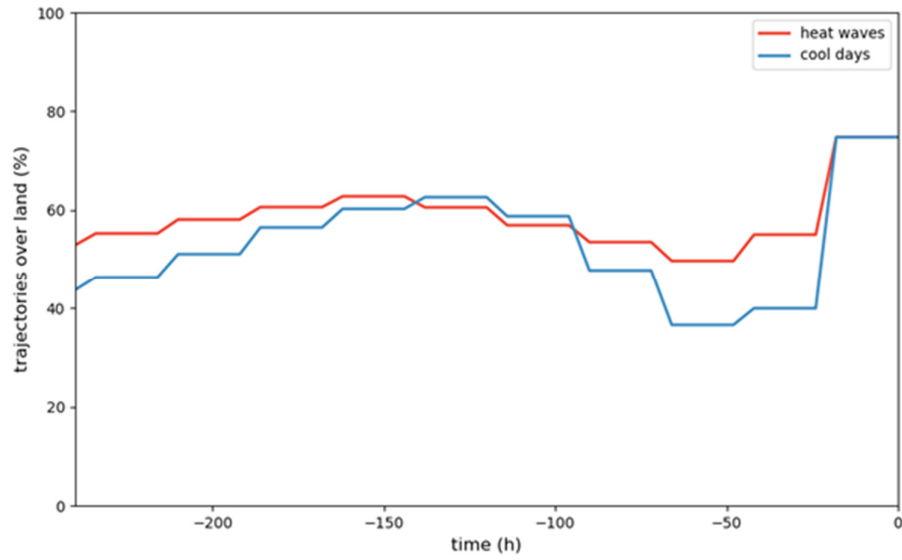

**Figure S2** The portion of trajectories over land, as defined by the ERA-Interim land-sea mask, for heat waves (red line) and cool days (blue line). The x-axis shows time lags (in h) relative to the first day of  $CSI \geq 90\%$  or  $CSI \leq 10\%$  and at 12UTC (0 h in the Figure).

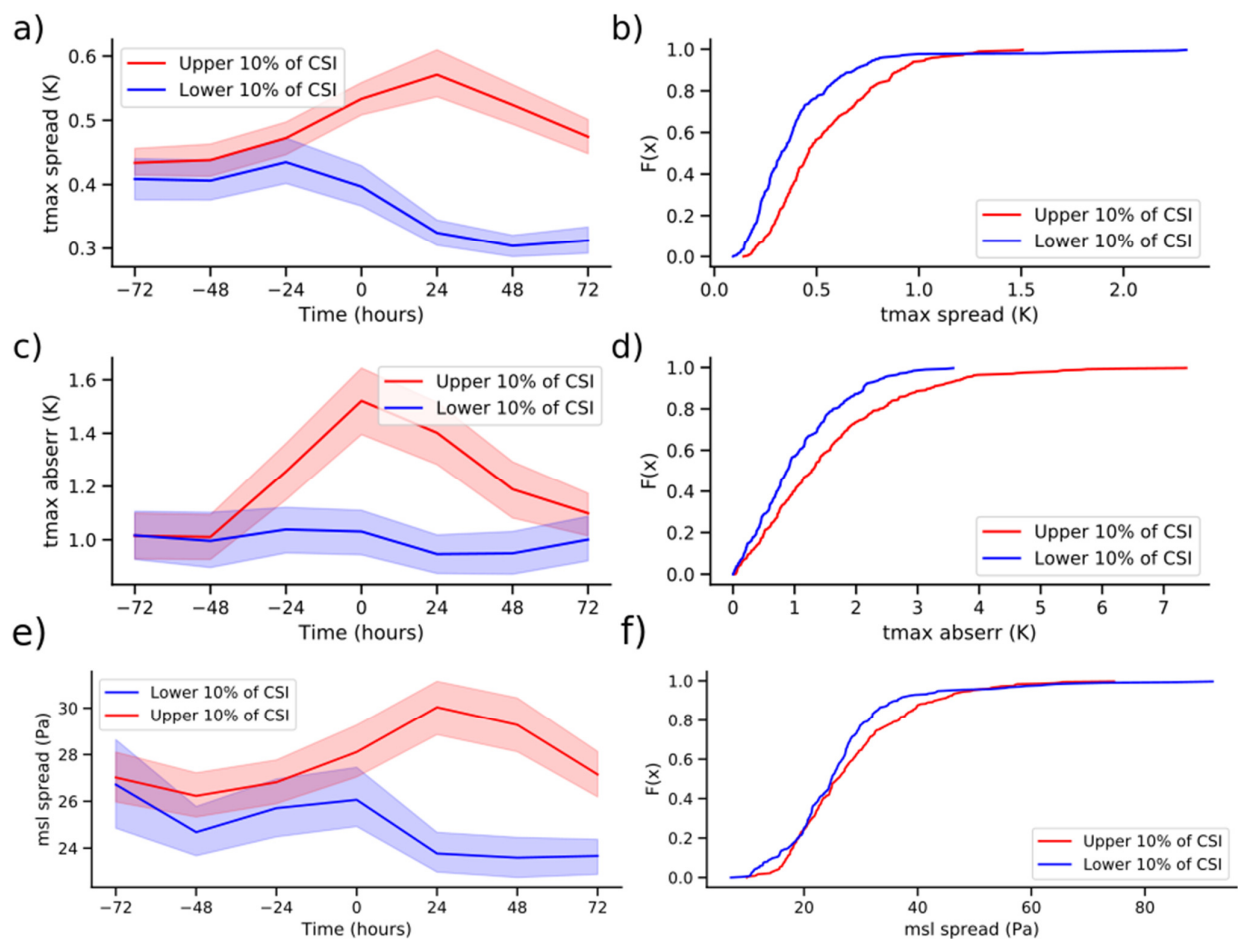

**Figure S3** Same as Figure 5 but showing forecast valid time in (a, c, e) and showing CDFs for the forecasts with lead time 69h, valid at 0 h in (b, d, f).

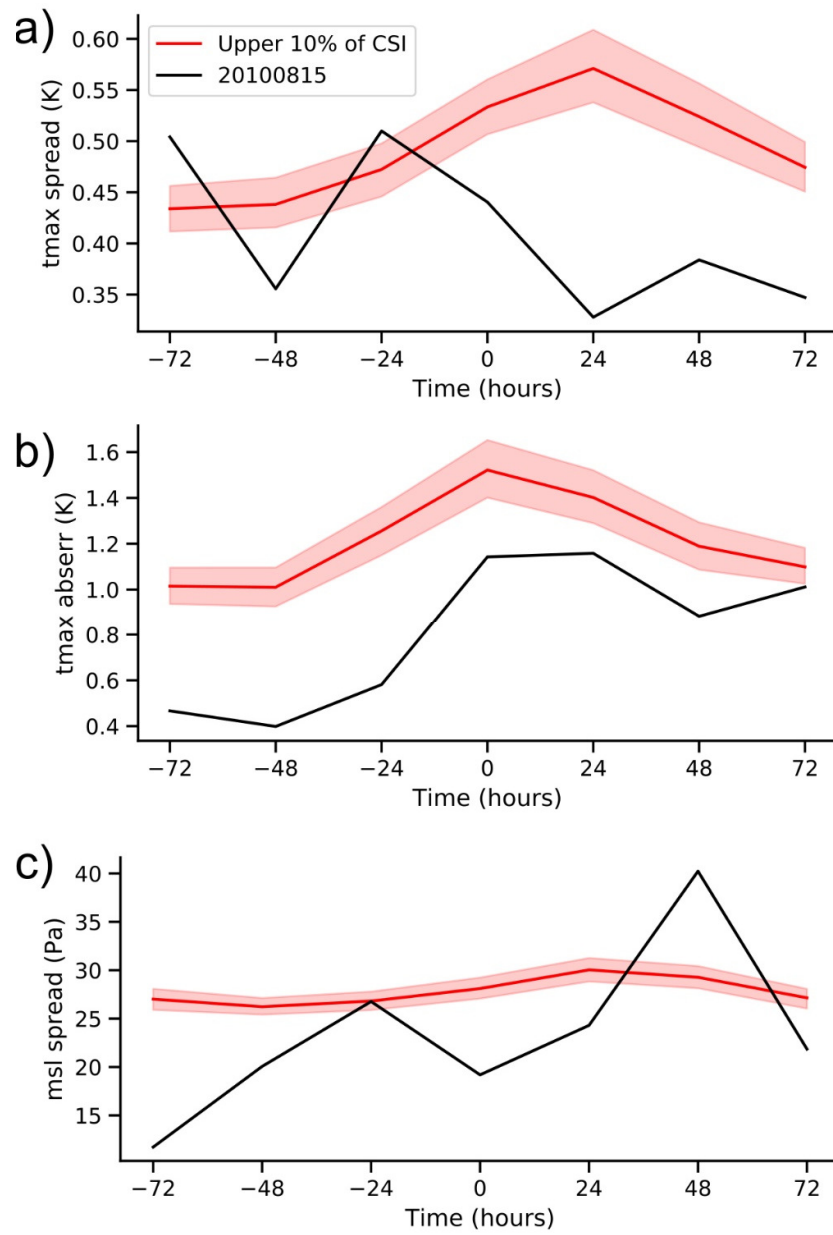

**Figure S4** Same as Figure 9 but showing forecast valid time.
